# Supplementary material
Source: publisher figshare collection journal article supplement (https://gsapubs.figshare.com/ndownloader/files/23299883)
Supplement: Supplementary file 1 [file 23299883]

## Sheet: SRB Hf data
Sample	(176Yb + 176Lu) / 176Hf (%)	Volts Hf	176Hf/177Hf	± (1-sigma)	176Lu/177Hf	176Hf/177Hf (T)	E Hf (0)	E Hf (0) ± (1s)	E Hf (T)	E Hf (T) ± (1s)	T CHUR (Ma)	T DM (Ma)	Weighted average	error (2s)	MSWD
Onion Gulch Unit
JZ-33 P1 1	25.6436	2.09649	0.282958	0.000137512	0.00135552	0.282954	6.12282	4.86278	9.28091	4.86278	-288.389	385.496	5.4	1.5	0.3
JZ-33 P1 2	17.1911	2.15732	0.282861	0.00013467	0.000890937	0.282858	2.68177	4.76228	5.8842	4.76228	-124.328	518.885
JZ-33 P1 3	20.853	2.11188	0.282833	0.000103868	0.00108411	0.28283	1.68342	3.67303	4.86661	3.67303	-78.4742	561.789
JZ-33 P1 4	10.3642	2.314	0.282957	9.16608e-05	0.000537755	0.282956	6.09119	3.24136	9.32932	3.24136	-279.78	378.437
JZ-33 P1 5	30.9114	1.93272	0.282841	7.09599e-05	0.00161614	0.282836	1.97236	2.50932	5.10358	2.50932	-93.4863	558.088
JZ-33 P1 6	27.5131	1.78997	0.282872	8.30916e-05	0.00144426	0.282868	3.06221	2.93833	6.21061	2.93833	-144.436	511.153
JZ-33 P1 7	21.5824	1.78643	0.282862	8.8945e-05	0.00113076	0.282859	2.73375	3.14532	5.91273	3.14532	-127.678	520.119
JZ-33 P1 8	23.6008	1.84104	0.282865	0.000108878	0.00123996	0.282862	2.83341	3.85019	6.00173	3.85019	-132.786	517.61
JZ-33 P1 9	8.63054	1.70171	0.282814	0.000116117	0.000464305	0.282812	1.00868	4.10619	4.25232	4.10619	-46.1272	579.36
JZ-33 P1 10	20.5233	1.91424	0.282839	7.87952e-05	0.00108071	0.282836	1.90923	2.7864	5.09283	2.7864	-89.0002	552.643
JZ-33 P1 11	27.1561	1.88636	0.282747	8.20207e-05	0.00141857	0.282743	-1.35517	2.90046	1.79429	2.90046	63.7445	690.19
JZ-33 P1 12	30.93	1.81799	0.282899	9.70876e-05	0.00160013	0.282895	4.04582	3.43327	7.17929	3.43327	-191.844	473.091
JZ-33 P1 13	11.8983	2.35663	0.282874	7.72649e-05	0.000632007	0.282872	3.14936	2.73229	6.37729	2.73229	-144.887	496.71
JZ-33 P1 14	20.8446	1.90974	0.282877	0.000114473	0.00110236	0.282874	3.23881	4.04804	6.42073	4.04804	-151.168	499.353
JZ-33 P1 15	18.3225	1.4994	0.282819	0.000110547	0.000960801	0.282817	1.21996	3.90923	4.41508	3.90923	-56.6435	578.544
JZ-33 P1 16	28.9304	1.6314	0.28278	6.73257e-05	0.00151107	0.282776	-0.160705	2.38081	2.9801	2.38081	7.585	643.345
JZ-33 P1 17	14.0718	1.84457	0.282833	0.00013	0.000736894	0.282831	1.71059	4.59713	4.92778	4.59713	-78.8987	555.538
JZ-33 P1 18	7.01174	2.49398	0.282811	0.000115862	0.000362745	0.28281	0.934459	4.09716	4.18802	4.09716	-42.6011	580.749
JZ-33 P1 19	22.5966	2.00055	0.282865	7.52675e-05	0.00121526	0.282862	2.82921	2.66165	5.99995	2.66165	-132.487	517.437
Sunrise Butte Unit
SB-1 1 P1	11.9288	2.79241	0.28289	8.82712e-05	0.000764069	0.282888	3.71042	3.12149	6.88209	3.12149	-171.428	476.015	7.1	1.5	0.82
SB-1 2 P1	20.0346	1.8187	0.282855	9.40049e-05	0.00123678	0.282851	2.46101	3.32425	5.58663	3.32425	-115.303	532.637
SB-1 3 P1	14.5392	2.18319	0.282942	0.000107389	0.000877207	0.282939	5.54791	3.79755	8.70925	3.79755	-257.416	403.686
SB-1 4 P1	21.9686	1.95544	0.282942	7.60723e-05	0.00114472	0.282939	5.55619	2.69011	8.6917	2.69011	-259.931	406.246
SB-1 5 P1	15.4739	2.30593	0.28294	9.35126e-05	0.000904038	0.282937	5.46861	3.30685	8.62733	3.30685	-253.936	407.162
SB-1 6 P1	16.4664	1.99676	0.282917	0.000120594	0.00099961	0.282915	4.68042	4.26452	7.82967	4.26452	-217.901	439.955
SB-1 8 P1	16.1835	1.83927	0.282846	9.31091e-05	0.00104195	0.282843	2.14483	3.29257	5.28916	3.29257	-99.8741	542.59
SB-1 9 P1	19.3335	1.68313	0.282906	7.55632e-05	0.00120621	0.282903	4.27454	2.67211	7.4037	2.67211	-200.241	458.83
SB-1 10 P1	20.2239	2.06926	0.282852	0.000102741	0.00111393	0.282849	2.38035	3.6332	5.51781	3.6332	-111.098	534.138
SB-1 11 P1	18.0305	1.95402	0.282985	9.17589e-05	0.00109475	0.282982	7.081	3.24483	10.2218	3.24483	-330.975	344.06
SB-1 12 P1	11.2533	1.76824	0.282703	7.56946e-05	0.000697961	0.282701	-2.9104	2.67675	0.265509	2.67675	133.813	738.87
SB-1 13 P1	11.3683	2.03801	0.282834	0.000110379	0.000734014	0.282832	1.74124	3.90328	4.91517	3.90328	-80.3065	554.273
SB-1 14 P1	9.31323	2.16173	0.282809	9.57282e-05	0.000549546	0.282807	0.838046	3.38519	4.0295	3.38519	-38.4202	587.433
SB-1 15 P1	11.1583	2.11213	0.282955	0.000122074	0.000689391	0.282953	6.00652	4.31687	9.18615	4.31687	-277.156	383.343
SB-1 16 P1	16.2145	2.31373	0.282827	0.000138665	0.00097865	0.282824	1.48321	4.90354	4.63343	4.90354	-68.9115	568.25
SB-1 17 P1	82.4092	1.67537	0.283016	8.87238e-05	0.00505435	0.283002	8.16738	3.1375	10.9262	3.1375	-435.13	335.728
Desolation Creek Unit
SB-137 P1 1	20.0063	1.42657	0.282904	9.69293e-05	0.000993674	0.282901	4.19114	3.42767	7.64337	3.42767	-195.044	459.584	6.8	1.6	0.63
SB-137 P1 2	21.3396	1.41922	0.282891	9.90298e-05	0.00101786	0.282888	3.75827	3.50195	7.2078	3.50195	-174.997	477.314
SB-137 3 P1	17.9348	1.45832	0.282999	9.31791e-05	0.000889515	0.282997	7.58271	3.29505	11.0472	3.29505	-352.272	321.991
SB-137 4 P1	15.6592	1.51426	0.282867	0.000107751	0.000765983	0.282865	2.90243	3.81034	6.3783	3.81034	-134.058	508.346
SB-137 5 P1	34.5475	1.24053	0.282941	7.98033e-05	0.00176851	0.282936	5.51407	2.82205	8.88477	2.82205	-263.023	414.889
SB-137 6 P1	25.1011	1.36374	0.28295	9.24082e-05	0.00115007	0.282946	5.82122	3.26779	9.25749	3.26779	-272.407	395.579
SB-137 7 P1	19.9035	1.39767	0.28274	8.81955e-05	0.00101608	0.282737	-1.57548	3.11882	1.87234	3.11882	73.1854	691.622
SB-137 8 P1	61.2652	1.30418	0.282821	7.99133e-05	0.00299331	0.282812	1.26019	2.82594	4.49976	2.82594	-62.4	609.954
SB-137 9 P1	20.6957	1.41662	0.282885	8.9784e-05	0.0010334	0.282882	3.53618	3.17499	6.98398	3.17499	-164.718	486.458
SB-137 10 P1	23.041	1.4632	0.282981	6.71176e-05	0.00110961	0.282977	6.9148	2.37345	10.3557	2.37345	-323.331	350.922
SB-137 11 P1	23.7793	1.59657	0.282911	6.48987e-05	0.00116115	0.282908	4.46732	2.29498	7.90193	2.29498	-208.998	450.48
SB-137 12 P1	17.8682	1.42345	0.282999	0.000118167	0.000939521	0.282996	7.56107	4.17868	11.0202	4.17868	-351.803	323.292
SB-137 13 P1	13.3275	1.67807	0.282872	0.000110213	0.000672023	0.28287	3.07375	3.89741	6.55963	3.89741	-141.576	500.251
SB-137 14 P1	32.3944	1.47071	0.282787	7.83887e-05	0.00161455	0.282782	0.0585228	2.77202	3.44358	2.77202	-2.77139	636.205
SB-137 15 P1	16.594	1.08606	0.282989	0.00022667	0.000854856	0.282987	7.21641	8.01564	10.6844	8.01564	-334.845	336.419
SB-137 16 P1	16.6275	1.39309	0.282695	0.000182518	0.000898858	0.282692	-3.17715	6.4543	0.282501	6.4543	146.958	753.464
SB-137 17 P1	26.7038	1.36467	0.282843	8.05189e-05	0.00137141	0.282839	2.04204	2.84736	5.45353	2.84736	-96.056	551.58
SB-137 18 P1	16.1238	1.4043	0.282921	0.000141912	0.000837013	0.282918	4.80198	5.01838	8.27102	5.01838	-222.46	433.178
